# Supplementary material for: Periodontal Disease and Healthcare Expenditures: A 7-Year Cohort Study of Employees in Japan
Source: Research Square preprint supplement (doi:10.21203/rs.3.rs-7813290/v1), 2025-11-19
Supplement: Supplementary file 1 [file 0765124712b7b63b4af1153b.xlsx]

## Sheet: Sheet1
Supplement Table: Details of the questionnaire
	No	Questions	Answers
		Are you taking the following medicines at present?
	Q1	a. Medication to reduce blood pressure	1. Yes 2. No
	Q2	b. Medication to reduce blood sugar or insulin injection	1. Yes 2. No
	Q3	c. Medication to reduce your level of cholesterol or of neutral fat	1. Yes 2. No
	Q4	Have you ever been told by the doctor you have had a stroke (cerebral hemorrhage, brain infarction, etc.) and received treatment?	1. Yes 2. No
	Q5	Have you ever been told by the doctor you have a heart disease (angina pectoris, myocardial infarction, etc.) and received treatment?	1. Yes 2. No
	Q6	Have you ever been diagnosed as having chronic kidney disease or kidney failure and received treatment (dialysis therapy)?	1. Yes 2. No
	Q7	Have you ever been diagnosed as anemic?	1. Yes 2. No
	Q8	Are you currently a heavy smoker? (※[Those currently smoking habitually] refers to those who apply to both Conditions 1 and 2. Condition 1: Smoked regularly within the previous month Condition 2: Smoked a lifetime total of six months or over, or a total of 100+cigarettes)	1. Yes (Conditions 1 and 2 are both applicable) 2. Smoked in the past but not within the past month (only Condition 2 is applicable) 3. No
	Q9	Have you gained over 10 kg from your weight at age 20?	1. Yes 2. No
	Q10	Are you in a habit of doing exercise to sweat lightly for over 30 minutes a time, 2 times weekly, for over a year?	1. Yes 2. No
	Q11	In your daily life do you walk or do any equivalent amount of physical activity for more than one hour a day?	1. Yes 2. No
	Q12	Is your walking speed faster than the speed of those of your age and sex?	1. Yes 2. No
	Q13	Which of these best describes your condition while eating and chewing on food?	1. I can chew on anything. 2. Sometimes I have difficulty chewing due to problems of tooth, gum, or occlusion. 3. I can hardly chew.
	Q14	Is your eating speed quicker than others?	1. Quicker 2. Normal 3. Slower
	Q15	Do you eat supper two hours before bedtime more than 3 times a week?	1. Yes 2. No
	Q16	Do you eat snacks or drink sweet beverages between meals?	1. Everyday 2. Sometimes 3. Rarely eat
	Q17	Do you skip breakfast more than 3 times a week?	1. Yes 2. No
	Q18	How often do you drink alcohol (Japanese sake, shochu, beer, western liquor)?	1. Everyday 2. 5-6 days per week 3. 3-4 days per week 4. 1-2 days per week 5. 1-3 times per month 6. Less than 1 day per month 7. Quit drinking 8. Don't drink
	Q19	How much do you drink per day?	1. Less than 180 ml 2. 180 – 360 ml 3. 360 – 540 ml 4. More than 540 ml
	Q20	Do you sleep well and enough?	1. Yes 2. No
	Q21	Do you want to improve your life habits of eating and exercising?	1. Don’t want to 2. Do want to (within 6 months) 3. Want to improve in near future (within a month) and began to start 4. Already trying to improve (less than 6 months) 5. Already trying to improve (over 6 months)
	Q22	Have you ever received any specific health guidance concerning improvements in lifestyle habits?	1. Yes 2. No
