# Supplementary material for: Periodontal Disease and Healthcare Expenditures: A 7-Year Cohort Study of Employees in Japan
Source: Research Square preprint supplement (doi:10.21203/rs.3.rs-7813290/v1), 2025-11-19
Supplement: Supplementary file 2 [file 4890b1626f01033329fa7696.xlsx]

## Sheet: Table1
Table 1 Baseline characteristics: general health and dental status by periodontal state
		Total	Priodontitis group	Non-periodontitis group
		(n=467)	(n=87)	(n=380)	p
	Age, years (SD)	44.5 (±8.9)	48.4 (±8.1)	43.6 (±8.8)	<0.001
	Height, cm (SD)	171.8 (±5.9）	170.6 (±5.9）	172.0 (±5.8）	0.45
	Weight, kg (SD)	76.3 (±10.3）	75.4 (±10.8）	76.4 (±10.2）	0.44
	Waist circumference, cm (SD)	90.7 (±7.3）	91.1 (±7.7）	90.6 (±7.2）	0.59
	BMI	25.8 (±3.1）	25.9 (±3.4）	25.8 (±3.1）	0.79
	Systolic blood pressure, mm Hg (SD)	126.4 (±12.2）	127.1 (±13.4）	126.2 (±11.9）	0.84
	Diastolic blood pressure, mm Hg (SD)	76.6 (±9.6）	78.1 (±10.8）	76.2 (±9.2）	0.4
	Total cholesterol, mg/dl (SD)	214.8 (32.0)	211.7 (30.6)	215.5 (32.3)	0.3
	HDL cholesterol, mg/dl (SD)	52.0 (±13.2）	52.8 (±13.8）	51.9 (±13.1）	0.56
	LDL cholesterol, mg/dl (SD)	133.8 (±29.7）	130.9 (±29.8）	134.5 (±29.6）	0.32
	TG, mg/dl (SD)	149.7 (±89.1)	149.9 (±111.6)	149.7 (±83.3)	0.99
	Fasting plasma glucose, mg/dl (SD)	102.4 (±18.1)	105.5 (±22.6)	101.7 (±16.8)	0.14
	HbA1c (NGSP) ,% (SD)	5.5 (±0.8)	5.6 (±0.9)	5.5 (±0.7)	0.15
	Smokers (%)	232 (49.7)	47 (54.0)	185 (48.7)	0.43
	Participants with untreated teeth, (%)	181 (38.8)	39 (44.8)	142 (37.4)	0.24
	Abbrevations: BMI, body mass index; TG, tryglyceride; NGSP, National Glycohemoglobin Standardization Program

## Sheet: Table2
Table 2 Expenditures for medical care, dental care, medications, and total healthcare by periodontal state
		Periodontitis group (n=87)	Non-periodontitis group (n=380)	Point estimation of the difference (95% CI)	P
	Medical care expenditure, JPY (median, [IQR])	41,160 [11,030-89,935]	21,770 [4,292-71,938]	19,390 (4,643 to 29,040)	0.03
	Dental care expenditure, JPY (median, [IQR])	12,760 [0-52,700]	7,030 [0-25,258]	5,730 (-1,856 to 206,556)	0.01
	Pharmaceutical expenditure, JPY (median, [IQR])	14,000 [4,440-54,640]	9,335 [3,272-31,428]	4,665 (-4,081 to 12,472)	0.23
	Total healthcare expenditure, JPY (median, [IQR])	97,030 [32,905-177,585]	51,415 [18,165-123,898]	45,615 (16,039 to 68,725)	0.002
	Abbrevations: JPY, Japanese Yen; IQR, Interquartile Range; CI, Confidential interval
